# Supplementary material
Source: PubMed Central journal article supplement (PMC7718391)
Supplement: NIHMS1641349-supplement-1.pdf [file NIHMS1641349-supplement-1.pdf]

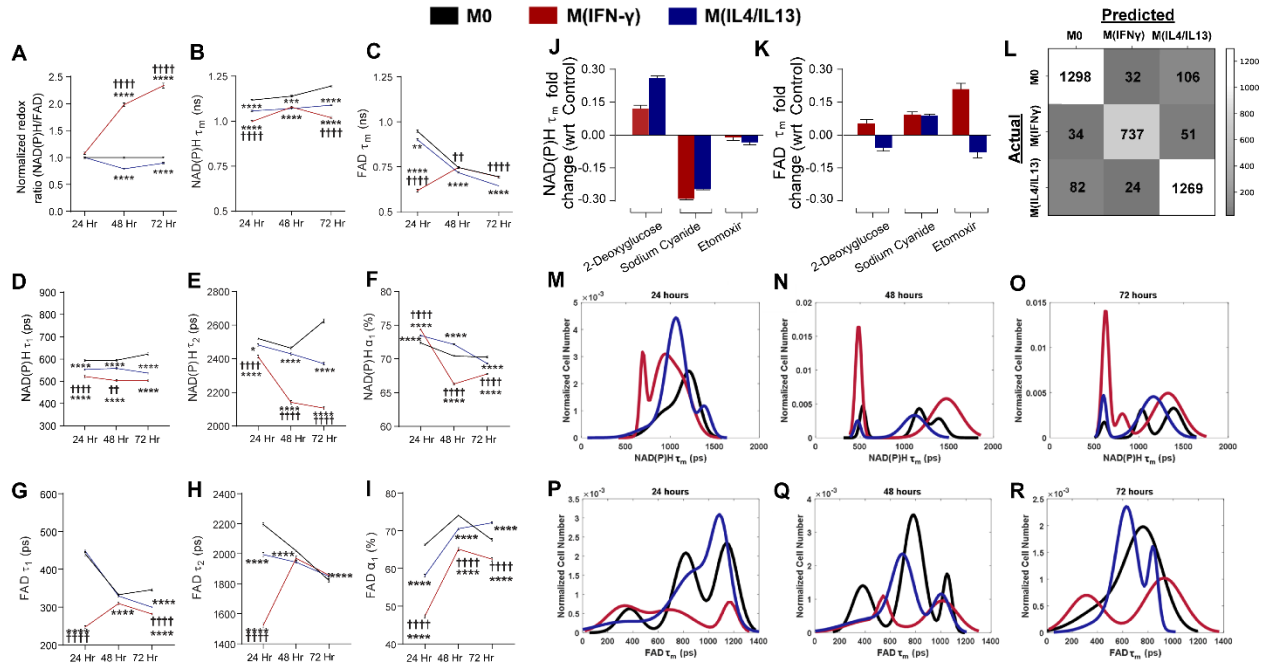

**Supplementary Figure 1: Fluorescence lifetimes of NAD(P)H and FAD exhibit differences between macrophage polarization states.** Quantitative measurement of A) Redox Ratio, B) NAD(P)H  $\tau_m$ , C) FAD  $\tau_m$ , D) NAD(P)H  $\tau_1$ , E) NAD(P)H  $\tau_2$ , F) NAD(P)H  $\alpha_1$ , G) FAD  $\tau_1$ , H) FAD  $\tau_2$ , I) FAD  $\alpha_1$ , illustrate metabolic differences across 2D cultures of RAW264.7 macrophages polarized to M0, M(IFN- $\gamma$ ), and M(IL4/IL13) over a 72-hour timecourse. (\*\*, \*\*\*, \*\*\*\* $p$ <0.01,0.001, 0.0001 vs. M0; ††, ††††  $p$ <0.01,0.0001 vs. M(IL4/IL13)) Fold change of J) NAD(P)H  $\tau_m$  and K) FAD  $\tau_m$  in response to treatment with 2-deoxyglucose, sodium cyanide, and etomoxir in M(IFN- $\gamma$ ) and M(IL4/IL13) macrophages shows metabolic inhibitor treatment alters NAD(P)H and FAD mean lifetimes of 2D polarized mouse macrophages. L) Graphical representation of confusion matrix for random forest classification of M0, M(IFN $\gamma$ ), and M(IL4/IL13) RAW264.7 mouse macrophages at all time points. Values along the diagonal (upper left to lower right) represent number of correctly classified cells per condition, while all other row values represent the number of misclassified cells for the respective condition. Population distribution modeling demonstrates metabolic heterogeneity for single-cell NAD(P)H  $\tau_m$  over M) 24 hours, N) 48 hours, and O) 72 hours and FAD  $\tau_m$  over P) 24 hours, Q) 48 hours, and R) 72 hours in macrophages unstimulated (M0) and stimulated to M(IFN- $\gamma$ ) and M(IL4/IL13).

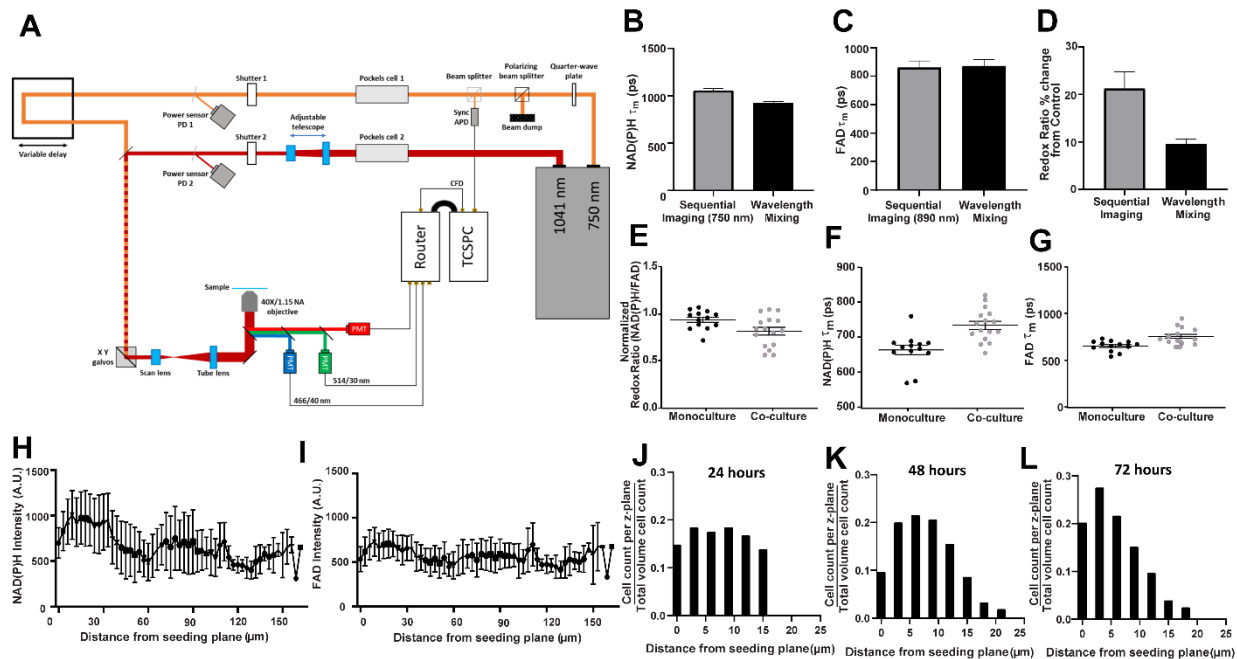

**Supplementary Figure 2: Validation of two-photon wavelength mixing for evaluating autofluorescence and migration effects in 2D cultures and the 3D Stacks microfluidic platform**

**A)** Diagram of wavelength mixing two-photon system (APD – avalanche photodiode, CFD – constant fraction discriminator, PD – photodiode, PMT – photomultiplier tube, TCSPC – time-correlated single photon counting electronics). Metabolic autofluorescence measurements were first assessed for consistency between sequential, two-color imaging and wavelength mixing approaches. Comparison of absolute values of **B)** NAD(P)H  $\tau_m$ , and **C)** FAD  $\tau_m$  in BT474 cells imaged with two-color imaging and wavelength mixing demonstrates similar fluorescence decay rate of both fluorophores. **D)** Relative fold change of Redox Ratio between control and sodium cyanide-treated BT474 human breast carcinoma cells imaged with the sequential, two-color imaging and wavelength mixing. Trends in redox measurements are conserved between both imaging techniques. Non-specific metabolic changes were evaluated from quantitative measurement of **E)** redox ratio, **F)** NAD(P)H  $\tau_m$ , and **G)** FAD  $\tau_m$  across 3D RAW264.7 macrophage monocultures or co-cultures of Polyoma Middle T-virus (PyVMT) breast cancer and RAW264.7 macrophages 1 hour post-seeding. Significant differences were not observed in redox or lifetime measurements between monocultured and co-cultured macrophages, demonstrating metabolic autofluorescence of monoculture and co-cultured macrophages are similar upon initial seeding. Additionally, single-cell measurements for **H)** NAD(P)H and **I)** FAD autofluorescence intensity with respect to distance from the macrophage seeding plane demonstrate no appreciable depth-dependent attenuation in collagen I ECM microwells imaged over 170  $\mu\text{m}$  depths. RAW264.7 macrophages were seeded at the top and bottom of 3D ECM layers, and migration was measured at **J)** 24 hours, **K)** 48 hours, and **L)** 72 hours. Migration was quantified from cell counts at each 3  $\mu\text{m}$  slice divided by the total cell count across the entire 3D macrophage layer. RAW264.7+RAW264.7 co-cultures exhibit minimal changes in cell distribution across the collagen layer, suggesting actively-migrating macrophage populations are absent in macrophage-macrophage co-cultures and active migration observed in tumor-macrophage co-cultures is induced by tumor stimuli.

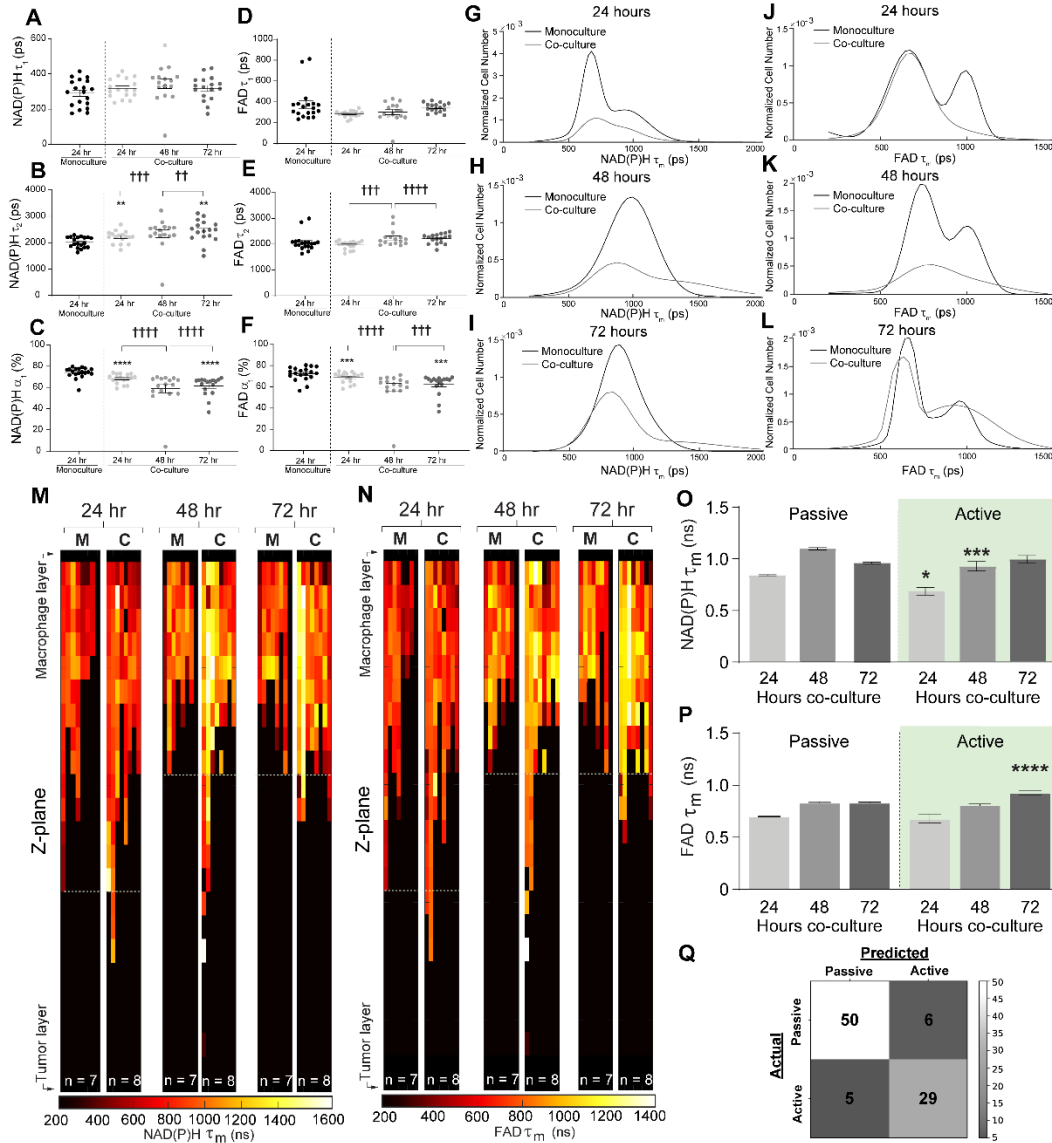

**Supplementary Figure 3: Prolonged co-culture of mouse breast cancer and macrophages yields heterogeneous NAD(P)H and FAD fluorescence lifetime and migration compared to monoculture.** Quantitative measurement of A) NAD(P)H  $\tau_1$ , B) NAD(P)H  $\tau_2$ , C) NAD(P)H  $\alpha_1$ , D) FAD  $\tau_1$ , E) FAD  $\tau_2$ , F) FAD  $\alpha_1$ , across 3D RAW264.7 macrophage monocultures or co-cultures of Polyoma Middle T-virus (PyVMT) breast cancer and RAW264.7 macrophages over 24, 48, and 72 hours. Population distribution modeling of single-cell NAD(P)H  $\tau_m$  at G) 24 hours, H) 48 hours, and I) 72 hours post-seeding and FAD  $\tau_m$  at J) 24 hours, K) 48 hours, and L) 72 hours post-seeding in monocultures and co-cultures. Representative heatmaps of M) NAD(P)H  $\tau_m$  and N) FAD  $\tau_m$  during RAW264.7 macrophage migration in 3D monocultures and co-cultures with PyVMT breast carcinoma. Both monocultured and co-cultured macrophages display increased heterogeneity in NAD(P)H and FAD lifetime, regardless of time and migration distance. Passively- and actively- migrating macrophage populations were defined in co-cultures over 72 hours to observe time-dependent relationships between O) NAD(P)H  $\tau_m$  and P) FAD  $\tau_m$  and migratory activity, \*, \*\*, \*\*\*\*p<0.05,0.001,0.0001 vs passive migration. Q) Graphical representation of confusion matrix for random forest classification of passively- vs. actively-migrating co-cultured RAW264.7 macrophages at all time points, illustrating the number of correctly classified cells per condition.

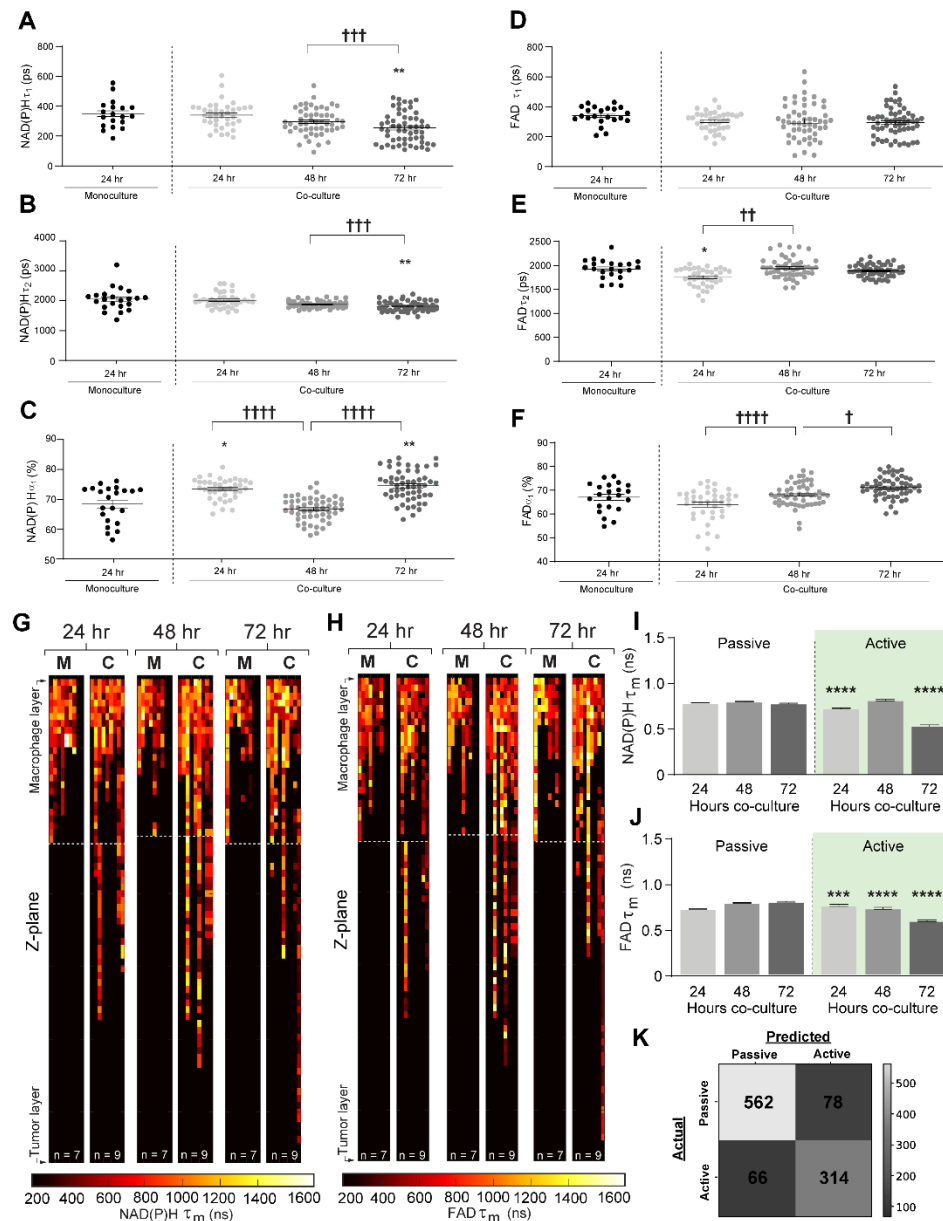

**Supplementary Figure 4: Primary human tumor cells stimulate changes in NAD(P)H and FAD fluorescence lifetime and cell migration in co-cultured human monocyte-derived macrophages.** Quantitative measurement of A) NAD(P)H  $\tau_1$ , B) NAD(P)H  $\tau_2$ , C) NAD(P)H  $\alpha_1$ , D) FAD  $\tau_1$ , E) FAD  $\tau_2$ , F) FAD  $\alpha_1$  across 3D monocultures of human THP-1s or co-cultures of primary breast cancer cells and THP-1s over 24, 48, and 72 hours. Representative heatmaps of G) NAD(P)H  $\tau_m$  and H) FAD  $\tau_m$  during THP-1 migration in 3D monocultures and co-cultures with primary breast carcinoma. Both monocultured monocytes and co-cultured monocyte-derived macrophages exhibit substantial heterogeneity in NAD(P)H and FAD lifetime within z-planes across the 3D layer at all timepoints. Differences in I) NAD(P)H  $\tau_m$ , and J) FAD  $\tau_m$  between actively- and passively-migrating populations were quantified at each time point. \*\*\*, \*\*\*\* p<0.001,0.0001 vs. passive migration. K) Confusion matrix for random forest classification of passively- vs. actively-migrating co-cultured THP-1 macrophages at all time points.

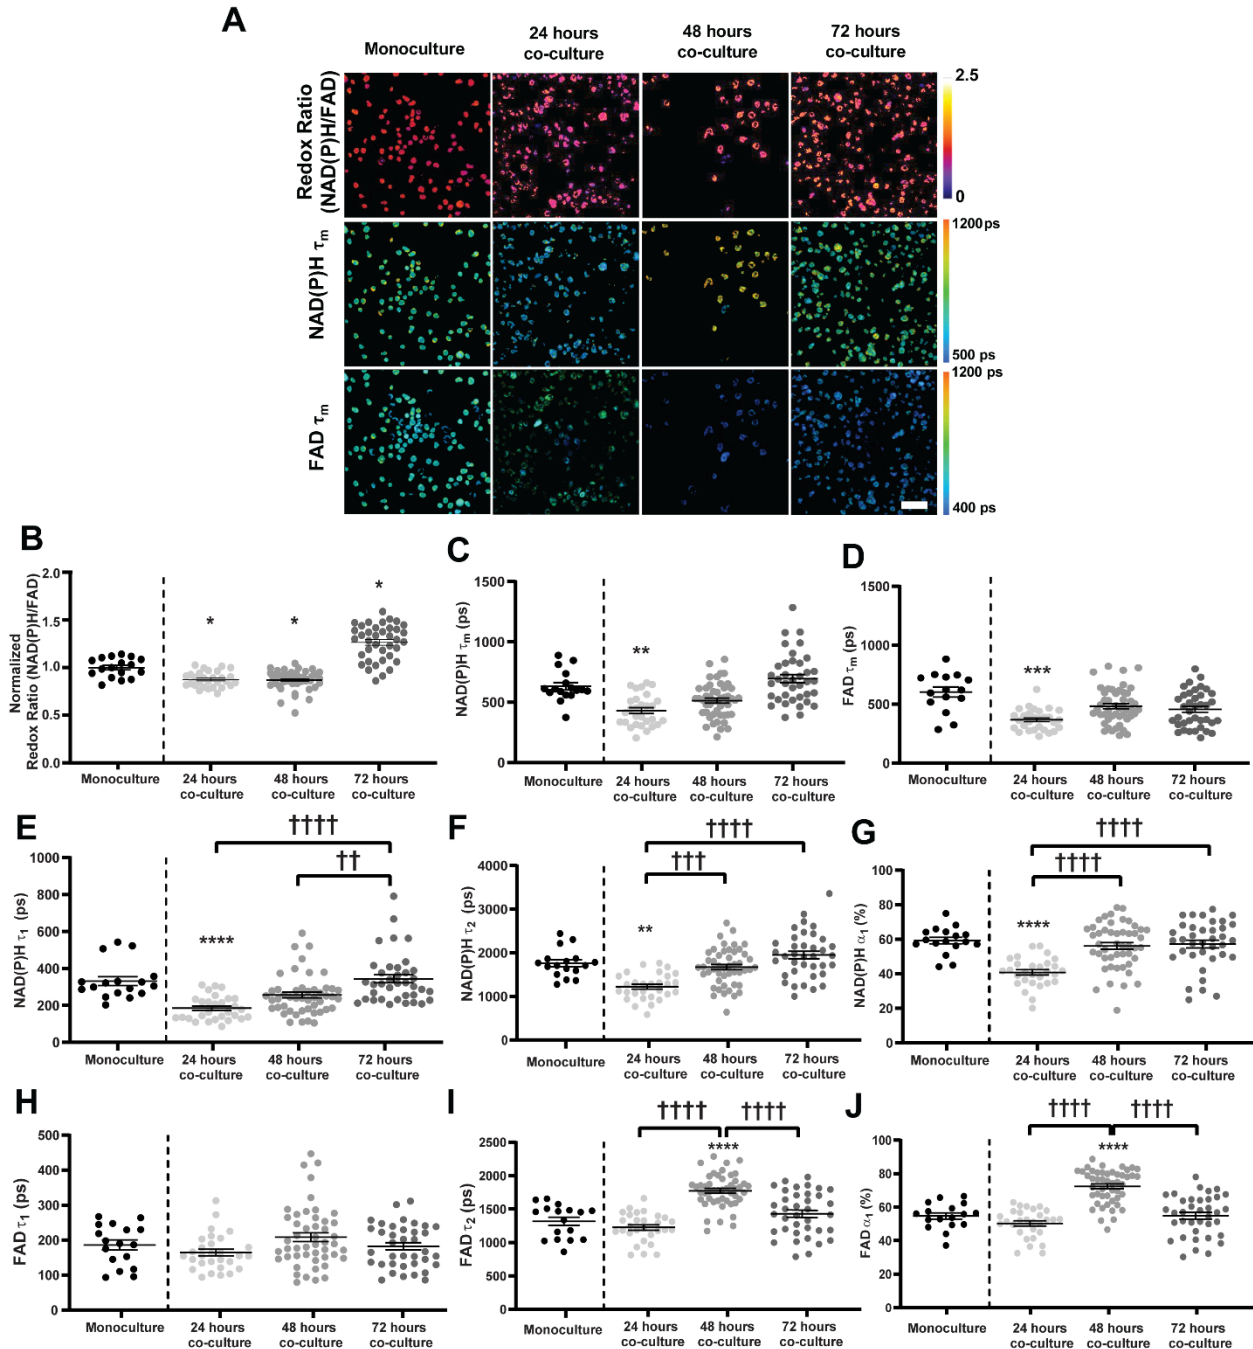

**Supplementary Figure 5: Metabolic changes in human THP-1s following co-culture with MDA-MB-231 human breast carcinoma.** A) Representative autofluorescence images demonstrate qualitative differences in the optical redox ratio, NAD(P)H  $\tau_m$ , and FAD  $\tau_m$  in 3D monocultures of human THP-1s or co-cultures of MDA-MB-231 breast cancer and THP-1s. Scale bar = 50  $\mu$ m. Quantitative trends in B) redox ratio, C) NAD(P)H  $\tau_m$ , D) FAD  $\tau_m$ , E) NAD(P)H  $\tau_1$ , F) NAD(P)H  $\tau_2$ , G) NAD(P)H  $\alpha_1$ , H) FAD  $\tau_1$ , I) FAD  $\tau_2$ , and J) FAD  $\alpha_1$  of monocultures or co-cultures over 24, 48, and 72 hours; \*, \*\*, \*\*\* p<0.05, 0.01, 0.001 vs monoculture.

**Supplementary Table 1: Mouse and Human Macrophage Polarization Gene Panels**

| Gene Symbol             | Refseq #                   | Official Full Name                                        | Associated Phenotype <sup>38</sup> |
|-------------------------|----------------------------|-----------------------------------------------------------|------------------------------------|
| <b>Mouse gene panel</b> |                            |                                                           |                                    |
| <i>Stat3</i>            | NM_011486                  | signal transducer and activator of transcription 3        | M2-like                            |
| <i>Vegfa</i>            | NM_001025                  | vascular endothelial growth factor A                      | M2-like                            |
| <i>Ccl5</i>             | NM_013653                  | chemokine (C-C motif) ligand 5                            | M1-like                            |
| <i>Il10</i>             | NM_010548                  | interleukin 10                                            | M2-like                            |
| <i>Ptgs2</i>            | NM_011198                  | prostaglandin-endoperoxide synthase 2                     | M2-like                            |
| <i>Ccl2</i>             | NM_011333                  | chemokine (C-C motif) ligand 2                            | M1-like                            |
| <i>Il23a</i>            | NM_031252                  | interleukin 23, alpha subunit p19                         | M1-like                            |
| <i>Ccl22</i>            | NM_009137                  | chemokine (C-C motif) ligand 22                           | Mixed                              |
| <i>Il12b</i>            | NM_008352,<br>XM_006532306 | interleukin 12b                                           | Mixed                              |
| <i>Il1b</i>             | NM_008361,<br>XM_006498795 | interleukin 1 beta                                        | M1-like                            |
| <i>Il6</i>              | NM_031168                  | interleukin 6                                             | Mixed                              |
| <i>Nos2</i>             | NM_010927,<br>XM_006532446 | nitric oxide synthase 2, inducible                        | Mixed                              |
| <i>Cxcl5</i>            | NM_009141                  | chemokine (C-X-C motif) ligand 5                          | M1-like                            |
| <i>Tnf</i>              | NM_013693,<br>NM_001278601 | tumor necrosis factor                                     | Mixed                              |
| <i>Hsp90ab1</i>         | NM_008302                  | heat shock protein 90 alpha (cytosolic), class B member 1 | Reference gene                     |
| <i>Pgk1</i>             | NM_008828                  | phosphoglycerate kinase 1                                 | Reference gene                     |
| <b>Human gene panel</b> |                            |                                                           |                                    |
| <i>VEGFA</i>            | NM001025366                | vascular endothelial growth factor A                      | M2-like                            |
| <i>IL10</i>             | NM_000572                  | interleukin 10                                            | Mixed                              |
| <i>PTGS2</i>            | NM_000963                  | prostaglandin-endoperoxide synthase 2                     | M2-like                            |
| <i>CCL2</i>             | NM_002982                  | chemokine (C-C motif) ligand 2                            | M1-like                            |
| <i>CCL22</i>            | NM_00990                   | chemokine (C-C motif) ligand 22                           | M2-like                            |
| <i>IL12B</i>            | NM_00187                   | interleukin 12b                                           | Mixed                              |
| <i>IL1B</i>             | NM_000576                  | interleukin 1 beta                                        | M1-like                            |
| <i>IL6</i>              | NM_000600                  | interleukin 6                                             | Mixed                              |
| <i>NOS2</i>             | NM_000625                  | nitric oxide synthase 2, inducible                        | Mixed                              |
| <i>TNF</i>              | NM_000594                  | tumor necrosis factor                                     | M1-like                            |
| <i>CSF1</i>             | NM_000757                  | colony stimulating factor 1 (macrophage)                  | Mixed                              |
| <i>TGFB1</i>            | NM_000660                  | transforming growth factor, beta 1                        | Mixed                              |
| <i>ACTB</i>             | NM_001101                  | actin, beta                                               | Reference gene                     |
| <i>B2M</i>              | NM_004048                  | beta-2-microglobulin                                      | Reference gene                     |

**Supplementary Table 2: Significance of redox ratio fold change in inhibitor-treated 2D cytokine-stimulated mouse macrophages**

| Inhibitor      | M(IFN- $\gamma$ )                      |           | M(IL4/IL13)                            |           |
|----------------|----------------------------------------|-----------|----------------------------------------|-----------|
|                | Redox ratio fold change relative to M0 | p-value   | Redox ratio fold change relative to M0 | p-value   |
| 2-Deoxyglucose | -0.5030                                | <0.000001 | -0.3283                                | 0.000676  |
| Sodium cyanide | 0.5729                                 | <0.000001 | 0.8256                                 | <0.000001 |
| Etomoxir       | 0.3084                                 | 0.000007  | 0.6204                                 | <0.000001 |

**Supplementary Table 3: Coefficients of variation (CV) and significance of CV equality for optical redox ratio in 2D cytokine-stimulated mouse macrophages and 3D mouse monocultures and co-cultures**

| Time     | Coefficient of variation |                   |             | Squared ranks test |
|----------|--------------------------|-------------------|-------------|--------------------|
|          | <b>2D culture</b>        |                   |             |                    |
|          | M0                       | M(IFN- $\gamma$ ) | M(IL4/IL13) | Test Statistic     |
| 24 hours | 0.786                    | 1.05              | 1.23        | -4.512 (*)         |
| 48 hours | 0.963                    | 0.892             | 1.08        | -78.823 (*)        |
| 72 hours | 1.04                     | 1.11              | 1.06        | -78.609 (*)        |
|          | <b>3D culture</b>        |                   |             |                    |
|          | Monoculture              | Co-culture        |             |                    |
| 24 hours | 0.241                    | 0.357             |             | 25.654 (*)         |
| 48 hours | 0.275                    | 0.385             |             | 8.997 (*)          |
| 72 hours | 0.249                    | 0.339             |             | 29.400 (*)         |

(\*) p <0.05
